# Supplementary material for: Social Capital and COVID-19 Deaths: An Ecological Analysis in Japan
Source: MDPI journal article supplement (doi:10.3390/ijerph182010982), 2021-10-19
Supplement: s1 [file s1]

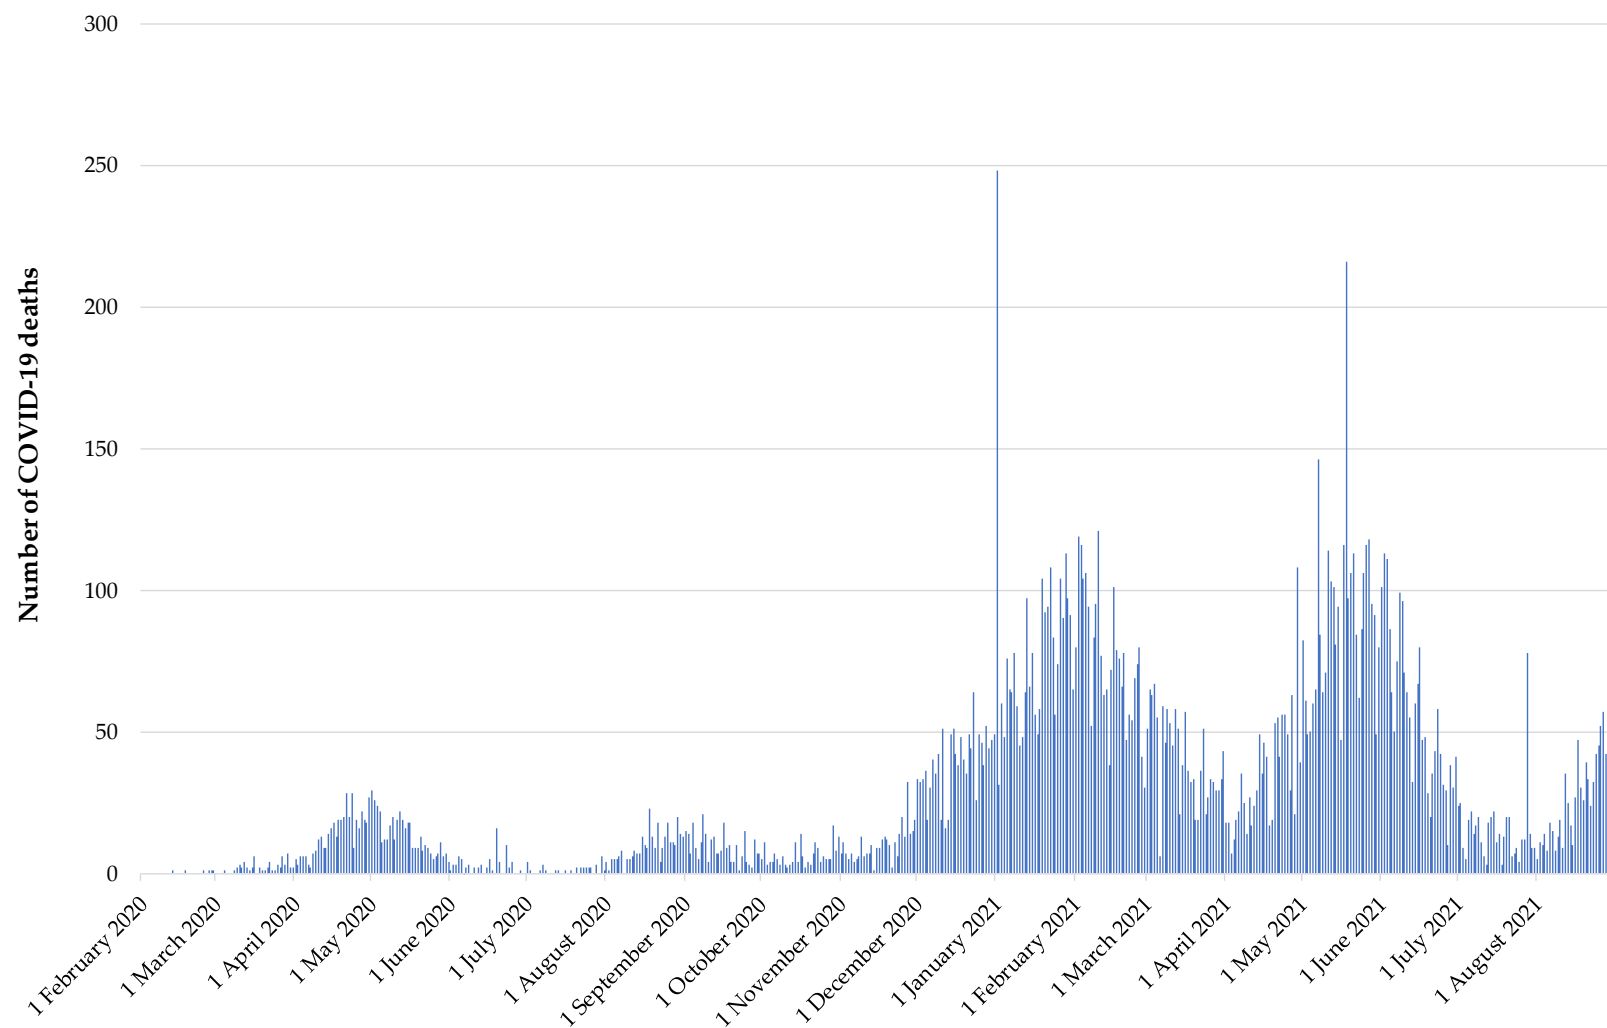

**Figure S1.** The transition of the number of COVID-19 deaths through 31 August 2021 in Japan

**Table S1.** Cumulative number of COVID-19 deaths by prefectures in Japan

| Prefecture | Population<br>(thousand<br>persons) | COVID-19 deaths per 100,000 individuals |                               |                            |                                                     |
|------------|-------------------------------------|-----------------------------------------|-------------------------------|----------------------------|-----------------------------------------------------|
|            |                                     | 1 October to<br>31 December<br>2020     | 1 January to<br>31 March 2021 | 1 April to<br>30 June 2021 | 1 October 2020<br>to 30 June 2021<br>(Total period) |
| Total      | 126,167                             | 1.50                                    | 4.52                          | 4.45                       | 10.47                                               |
| Hokkaido   | 5,250                               | 6.59                                    | 5.64                          | 12.38                      | 24.61                                               |
| Aomori     | 1,246                               | 0.56                                    | 0.96                          | 0.88                       | 2.41                                                |
| Iwate      | 1,227                               | 1.96                                    | 0.49                          | 1.30                       | 3.75                                                |
| Miyagi     | 2,306                               | 0.61                                    | 0.65                          | 2.56                       | 3.82                                                |
| Akita      | 966                                 | 0.10                                    | 0.52                          | 1.45                       | 2.07                                                |
| Yamagata   | 1,078                               | 0.46                                    | 0.93                          | 2.88                       | 4.27                                                |
| Fukushima  | 1,846                               | 0.92                                    | 4.93                          | 2.71                       | 8.56                                                |
| Ibaraki    | 2,860                               | 0.66                                    | 3.18                          | 1.29                       | 5.14                                                |
| Tochigi    | 1,934                               | 0.26                                    | 3.31                          | 0.57                       | 4.14                                                |
| Gunma      | 1,942                               | 1.29                                    | 2.83                          | 2.73                       | 6.85                                                |
| Saitama    | 7,350                               | 1.41                                    | 6.72                          | 1.78                       | 9.92                                                |
| Chiba      | 6,259                               | 0.73                                    | 7.21                          | 2.20                       | 10.15                                               |
| Tokyo      | 13,921                              | 1.57                                    | 8.21                          | 3.33                       | 13.12                                               |
| Kanagawa   | 9,198                               | 1.47                                    | 5.52                          | 1.82                       | 8.81                                                |
| Niigata    | 2,223                               | 0.13                                    | 0.67                          | 1.53                       | 2.34                                                |
| Toyama     | 1,044                               | 0.00                                    | 0.29                          | 0.86                       | 1.15                                                |
| Ishikawa   | 1,138                               | 0.35                                    | 1.14                          | 4.48                       | 5.98                                                |
| Fukui      | 768                                 | 0.13                                    | 1.69                          | 1.17                       | 2.99                                                |
| Yamanashi  | 811                                 | 0.62                                    | 0.99                          | 0.25                       | 1.85                                                |
| Nagano     | 2,049                               | 0.68                                    | 1.27                          | 2.44                       | 4.39                                                |
| Gifu       | 1,987                               | 1.21                                    | 4.58                          | 3.12                       | 8.91                                                |
| Shizuoka   | 3,644                               | 1.07                                    | 2.11                          | 0.88                       | 4.06                                                |
| Aichi      | 7,552                               | 1.66                                    | 4.91                          | 5.05                       | 11.61                                               |
| Mie        | 1,781                               | 0.62                                    | 2.92                          | 2.36                       | 5.90                                                |
| Shiga      | 1,414                               | 0.21                                    | 3.11                          | 2.48                       | 5.80                                                |
| Kyoto      | 2,583                               | 0.85                                    | 4.72                          | 2.83                       | 8.40                                                |
| Osaka      | 8,809                               | 4.23                                    | 6.87                          | 16.88                      | 27.98                                               |
| Hyogo      | 5,466                               | 2.74                                    | 6.92                          | 13.17                      | 22.83                                               |

|           |       |      |      |      |      |
|-----------|-------|------|------|------|------|
| Nara      | 1,330 | 1.13 | 2.33 | 5.71 | 9.17 |
| Wakayama  | 925   | 0.32 | 1.19 | 3.35 | 4.86 |
| Tottori   | 556   | 0.00 | 0.36 | 0.00 | 0.36 |
| Shimane   | 674   | 0.00 | 0.00 | 0.15 | 0.15 |
| Okayama   | 1,890 | 0.69 | 1.16 | 4.81 | 6.67 |
| Hiroshima | 2,804 | 0.93 | 2.75 | 2.46 | 6.13 |
| Yamaguchi | 1,358 | 0.07 | 2.95 | 2.50 | 5.52 |
| Tokushima | 728   | 0.00 | 1.24 | 6.18 | 7.42 |
| Kagawa    | 956   | 0.10 | 1.67 | 1.26 | 3.03 |
| Ehime     | 1,339 | 0.52 | 0.82 | 3.81 | 5.15 |
| Kochi     | 698   | 0.43 | 1.72 | 0.86 | 3.01 |
| Fukuoka   | 5,104 | 0.43 | 4.17 | 3.68 | 8.29 |
| Saga      | 815   | 0.37 | 1.23 | 1.35 | 2.94 |
| Nagasaki  | 1,327 | 0.08 | 2.64 | 2.26 | 4.97 |
| Kumamoto  | 1,748 | 0.46 | 3.32 | 2.40 | 6.18 |
| Oita      | 1,135 | 0.35 | 1.41 | 3.61 | 5.37 |
| Miyazaki  | 1,073 | 0.37 | 1.58 | 0.47 | 2.42 |
| Kagoshima | 1,602 | 0.12 | 0.87 | 0.62 | 1.62 |
| Okinawa   | 1,453 | 2.41 | 3.23 | 3.79 | 9.43 |

---
